# Supplementary material for: A reconfigurable microfluidic building block platform for high-throughput nonhormonal contraceptive screening
Source: Royal Society of Chemistry journal article supplement (doi:10.1039/d2lc00424k), 2022-01-01
Supplement: d2lc00424k1.pdf [file d2lc00424k1.pdf]

## Supplementary Information

### A Reconfigurable Microfluidic Building Block Platform for High-Throughput Nonhormonal Contraceptive Screening

Jyong-Huei Lee<sup>a</sup>, Carl van der Linden<sup>b</sup>, Francisco J. Diaz<sup>b\*</sup>, and Pak Kin Wong<sup>a,c\*</sup>

<sup>a</sup>Department of Biomedical Engineering, The Pennsylvania State University, University Park, PA, 16802

<sup>b</sup>Department of Animal Science, The Pennsylvania State University, University Park, PA, 16802

<sup>c</sup>Department of Mechanical Engineering and Department of Surgery, The Pennsylvania State University, University Park, PA, 16802

#### Corresponding authors:

Francisco J. Diaz, email: [fjd10@psu.edu](mailto:fjd10@psu.edu)

Pak Kin Wong, email: [pak@enr.psu.edu](mailto:pak@enr.psu.edu)

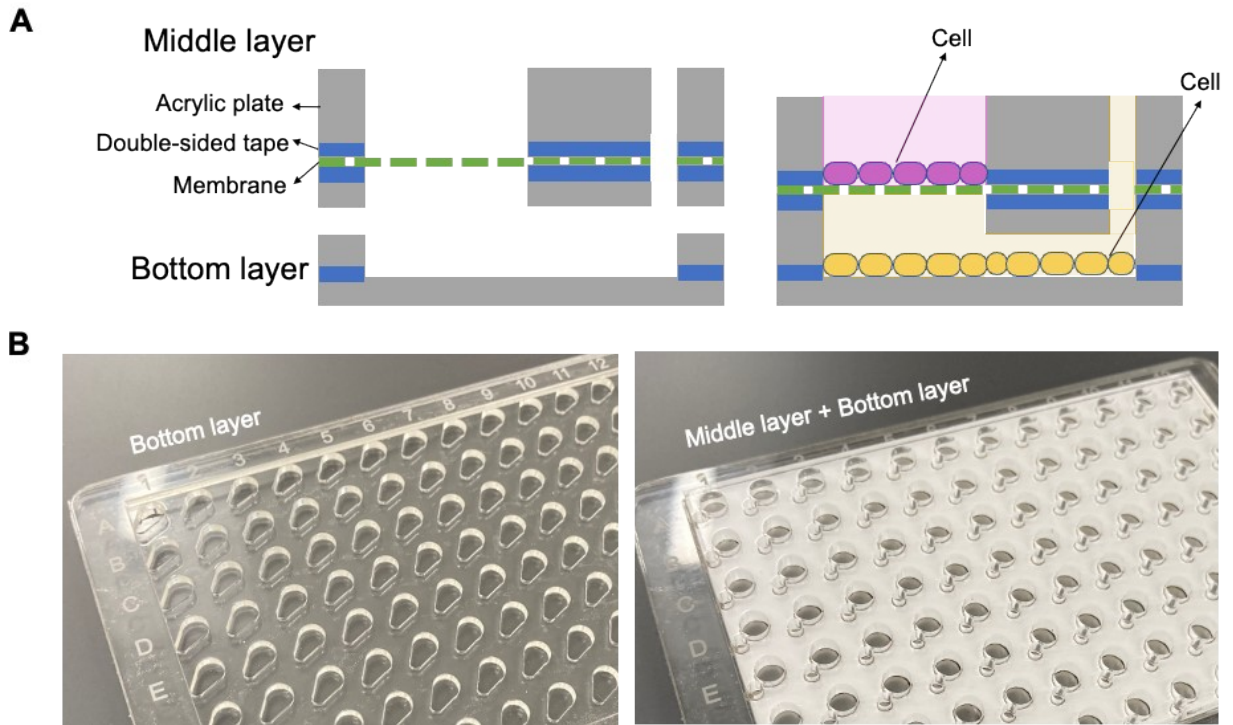

**Figure S1.** Transwell device design. A) Cross-sectional view of the transwell design (single well). B) Photographs of the middle layer (microwells with an embedded membrane) assembled on the bottom layer.

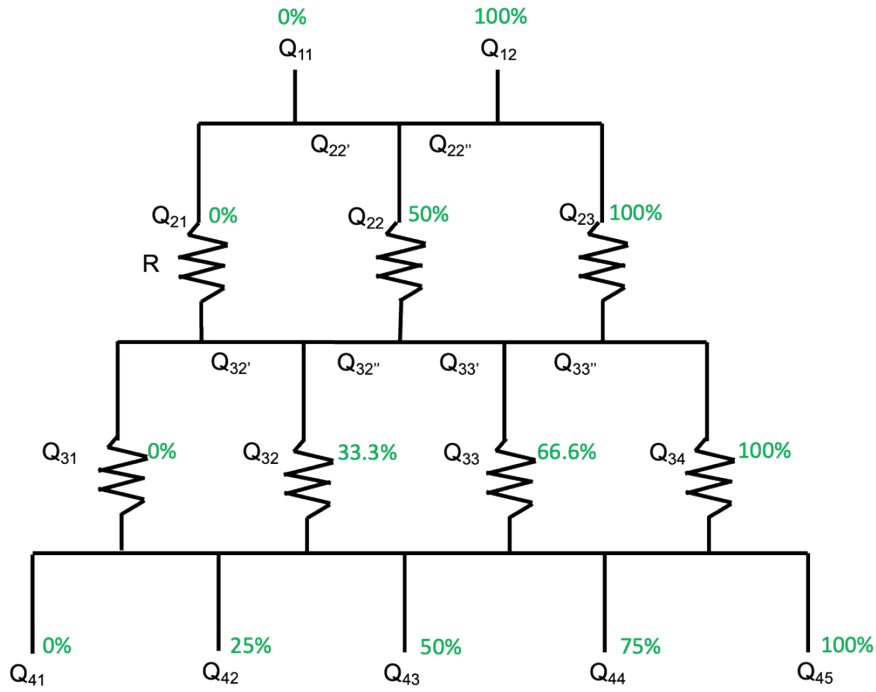

$$Q_{11}=Q_{12}=Q$$

$$Q_{21}=Q_{22}=Q_{23}= 2/3 Q$$

$$Q_{31}=Q_{32}=Q_{33}=Q_{34}= 1/2 Q$$

$$Q_{32}'=Q_{21}-Q_{31}= 1/6Q=Q_{33}''$$

$$Q_{32}''= 1/3 Q=Q_{33}'$$

$$Q_{41}=Q_{42}=Q_{43}=Q_{44}= Q_{45} = 2/5 Q$$

$$Q_{42}'= Q_{31}-Q_{41}= 1/10 Q= Q_{44}''$$

$$Q_{42}''= Q_{42} - Q_{42}'= 3/10 Q= Q_{44}'$$

$$Q_{43}'= Q_{43}''=1/5Q$$

$$C_{ij}=(Q_{ij}'/Q_{ij})C_{i-1,j-1}+ (Q_{ij}''/Q_{ij})C_{i-1,j}$$

Figure S2. Equivalent circuit model of the chemical gradient generator.
